# Supplementary material for: New microporous copper(II) coordination polymers based upon bifunctional 1,2,4-triazole/tetrazolate bridges
Source: Royal Society of Chemistry journal article supplement (doi:10.1039/b806671j), 2008-01-01
Supplement: b806671j.pdf [file b806671j.pdf]

## SUPPORTING INFORMATION

### New microporous copper(II) coordination polymers based upon bifunctional 1,2,4-triazole/tetrazolate bridges

O. A. Bondar, L. V. Lukashuk, A. B. Lysenko, H. Krautscheid, E. B. Rusanov, A. N. Chernega, and K. V. Domasevitch.

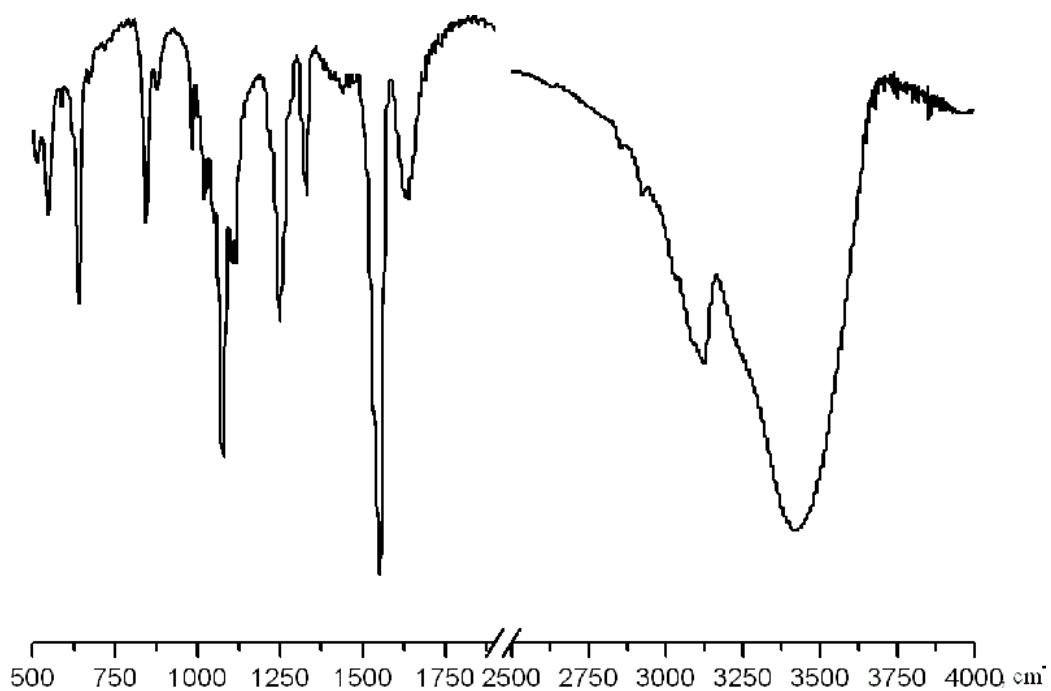

**Figure SI\_1.** IR spectra for complex  $\text{Cu}(\text{L1})_2\text{Cl}_2 \cdot 12\text{H}_2\text{O}$  (**3**).

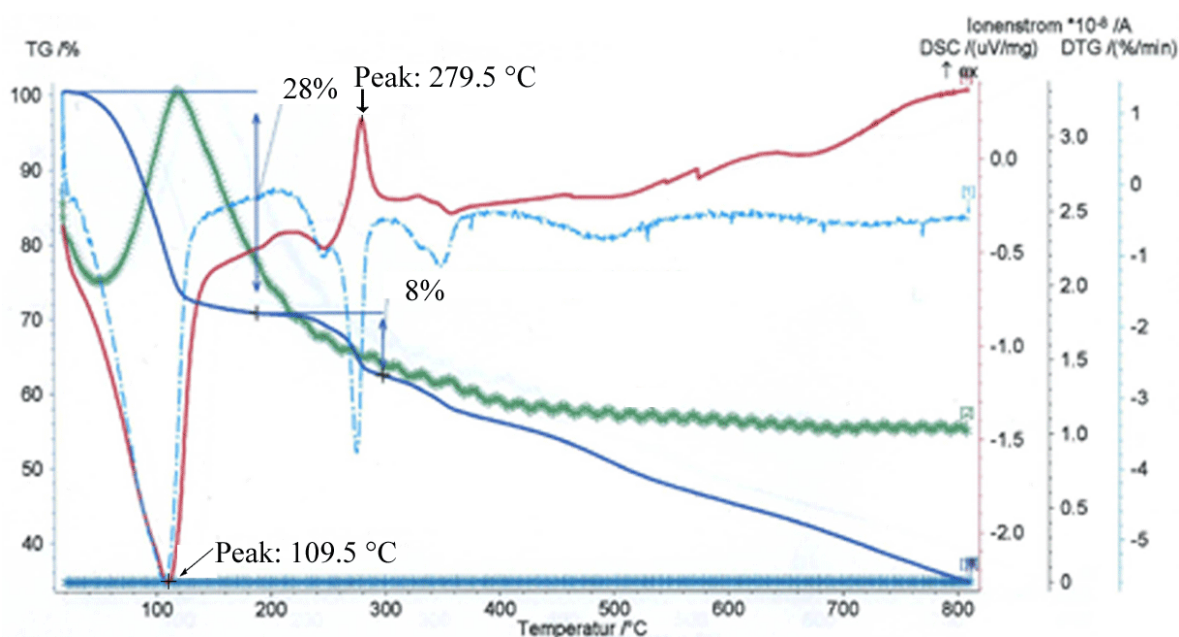

**Figure SI\_2.** TGA, DTA and DSC traces of the complex  $\text{Cu}(\text{L1})_2\text{Cl}_2 \cdot 12\text{H}_2\text{O}$  (**3**) measured in the 20-800 °C temperature range.

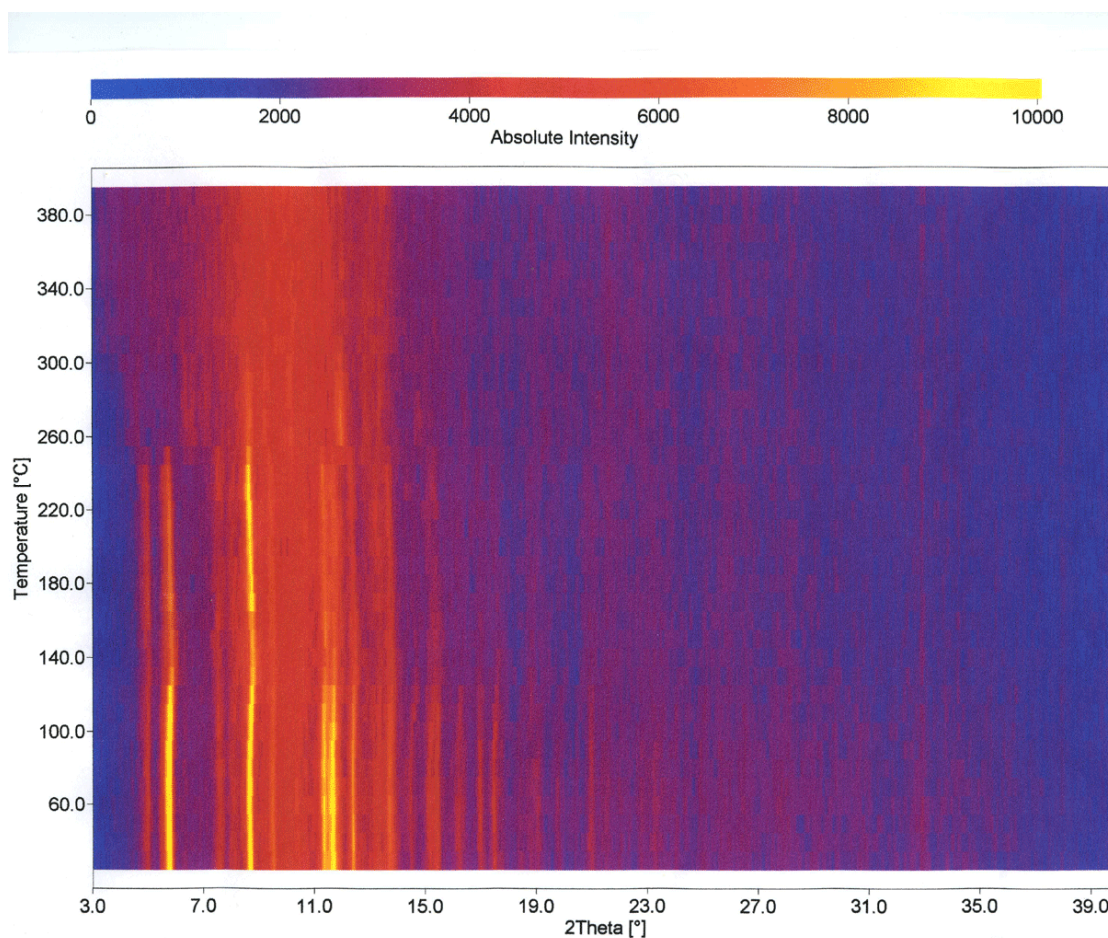

**Figure SI\_3.** Thermodiffractograms for **3** were measured in the 20-400°C temperature range.

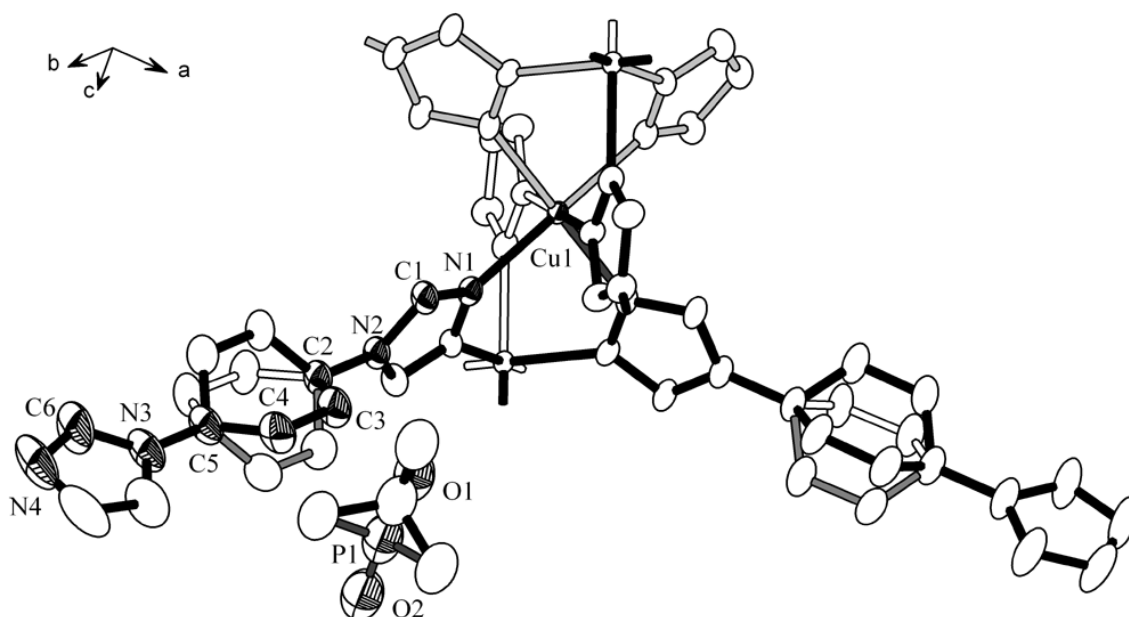

**Figure SI\_4.** Atom labelling scheme for structure  $[\text{Cu}(\mu_2\text{-L1})_3]\text{PO}_3\text{F}$  (**1**) (20% ellipsoids, hydrogen atoms omitted for clarity). The uncoordinated  $\text{PO}_3\text{F}$  dianion was refined with fixed geometry of tetrahedral  $\text{PO}_4$ . The anions are disordered over two positions (occupancy factor  $\frac{1}{2}$ ).

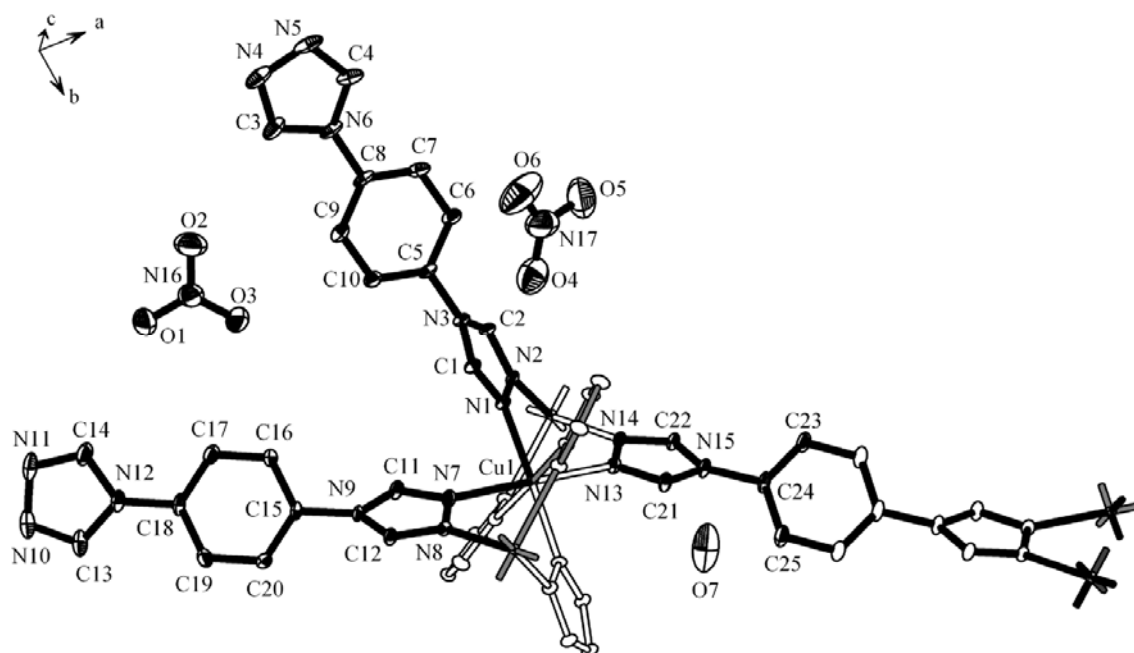

**Figure SI\_5.** Atom labelling scheme for structure  $\text{Cu}(\text{L1})_5(\text{NO}_3)_4 \cdot 2\text{H}_2\text{O}$  (**2**) (30% ellipsoids, hydrogen atoms omitted for clarity).

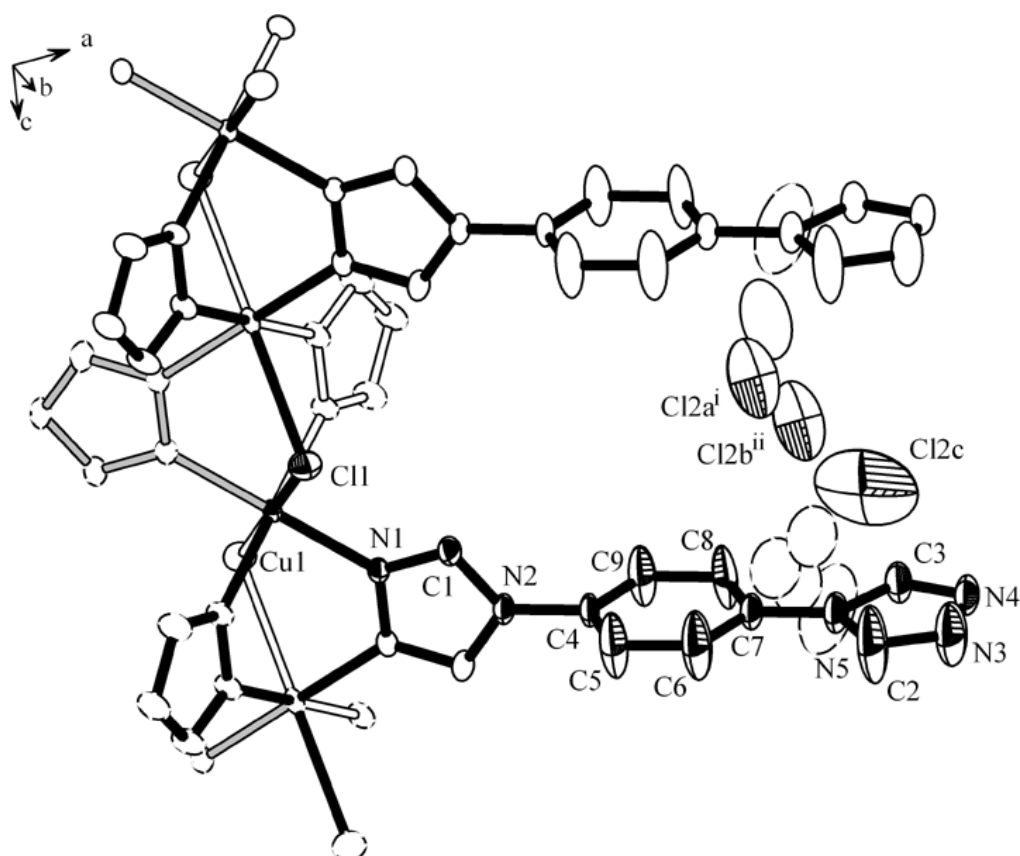

**Figure SI\_6.** Atom labelling scheme for structure  $\text{Cu}(\text{L1})_2\text{Cl}_2 \cdot 12\text{H}_2\text{O}$  (**3**) (30% ellipsoids, hydrogen atoms omitted for clarity). The uncoordinated chloride anions are statistically disordered in the framework (occupancy factor 1/8; i: 0.5-x, 0.5-y, -0.5+z; ii: 0.5-x, -0.5+y, 1.5-z).

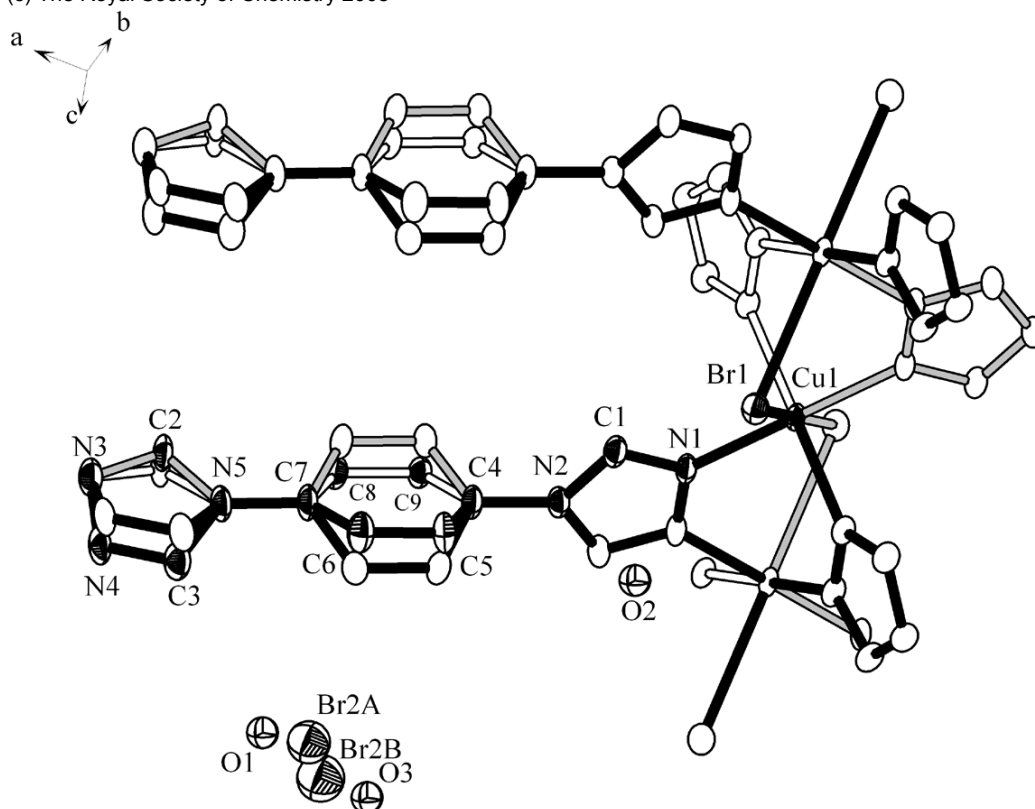

**Figure SI\_7.** Atom labelling scheme for structure  $\text{Cu}(\text{L1})_2\text{Br}_2 \cdot 12\text{H}_2\text{O}$  (**4**) (30% ellipsoids, hydrogen atoms omitted for clarity). The uncoordinated bromide anions and water molecules are located within the framework and statistically disordered (occupancy factors: for Br2A, Br2B 0.13; for O1, O3 and O2 are 0.5 and 0.25, respectively). The phenylene linker and uncoordinated triazole termini are disordered over two positions along the N2-N5 direction (partial contributions 0.5).

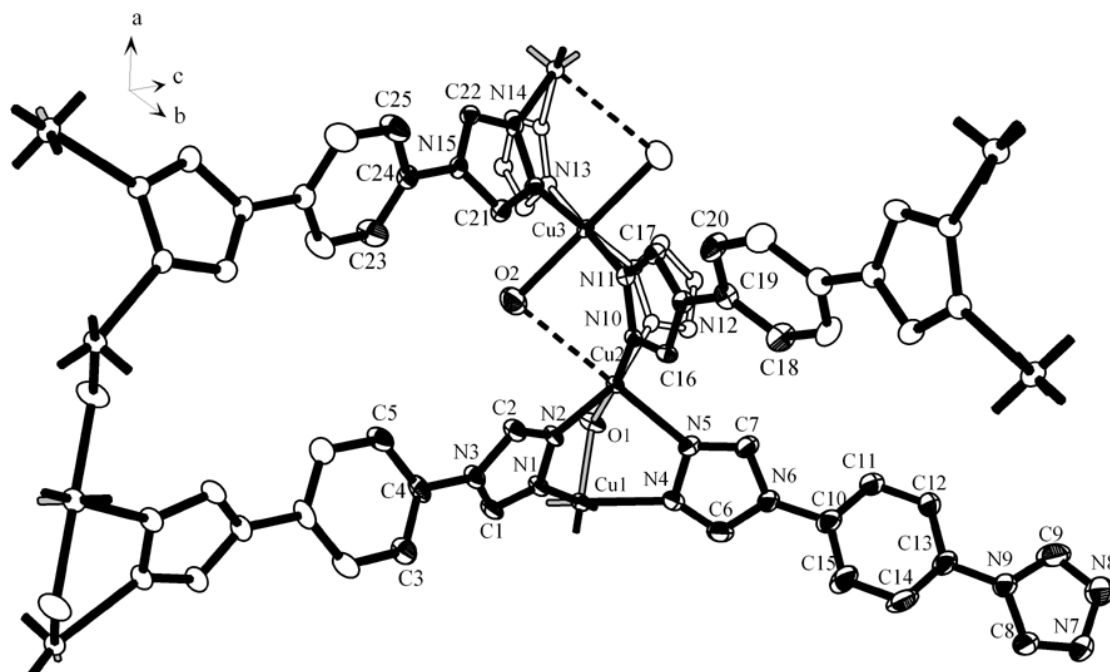

**Figure SI\_8.** Atom labelling scheme for structure  $\text{Cu}_4(\mu_2\text{-OH})_2(\text{L1})_5(\text{H}_2\text{O})_2(\text{CF}_3\text{SO}_3)_6 \cdot 10\text{H}_2\text{O}$  (**5**), (50% ellipsoids, the uncoordinated OTf<sup>-</sup> anions, water molecules and hydrogen atoms omitted for clarity).

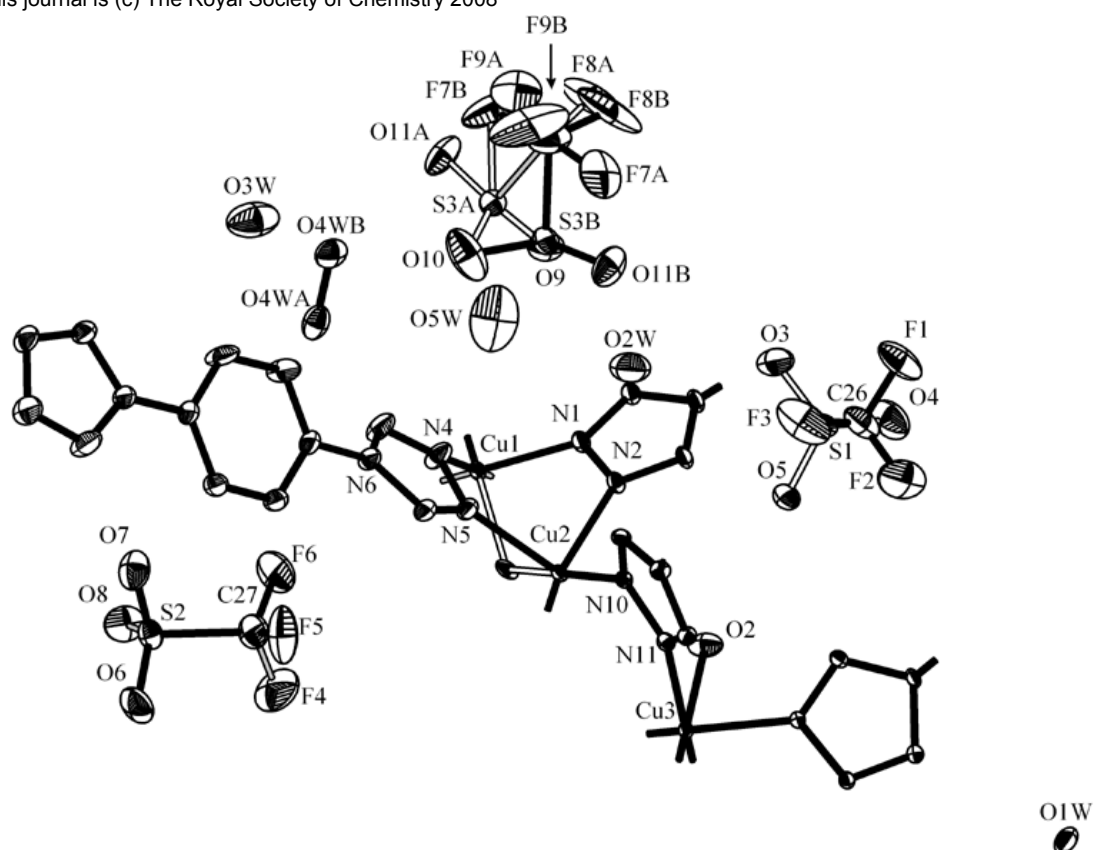

**Figure SI\_9.** Atom labelling scheme for structural fragment in (5), showing disordering water molecules and  $\text{CF}_3\text{SO}_3^-$  (30% ellipsoids, hydrogen atoms omitted for clarity).

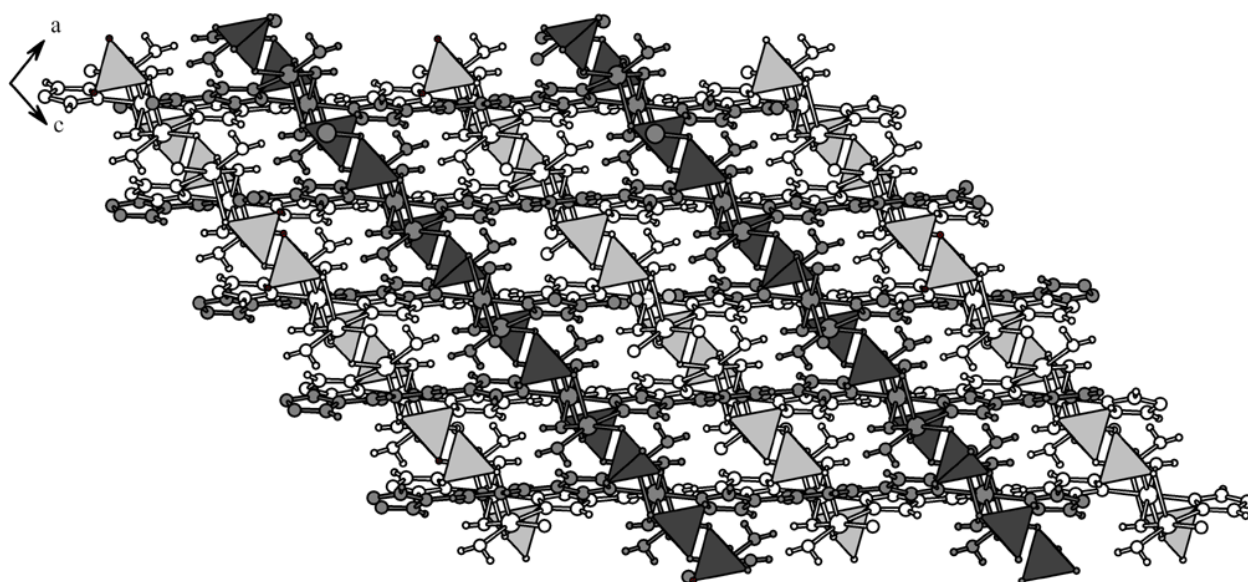

**Figure SI\_10.** A view of the two interpenetrating nets of compound  $\text{Cu}_3(\mu_2\text{-OH})_2(\text{L1})(\text{H}_2\text{O})_2(\text{SO}_4)_2$  (6) (sulfates shown as polyhedra).

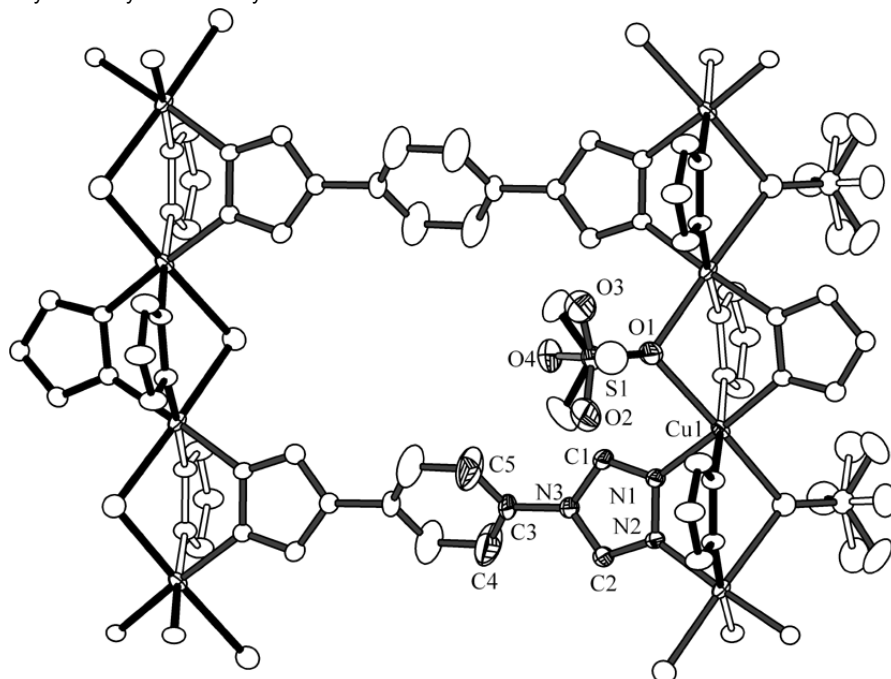

**Figure SI\_11.** Atom labelling scheme for structure  $\text{Cu}(\mu_4\text{-L1})(\mu_2\text{-SO}_4)\cdot 6\text{H}_2\text{O}$  (**7**). The coordinated sulfate anions are disordered along the twofold orientation axis with occupancy factor of  $\frac{1}{2}$  (50% ellipsoids, hydrogen atoms omitted for clarity).

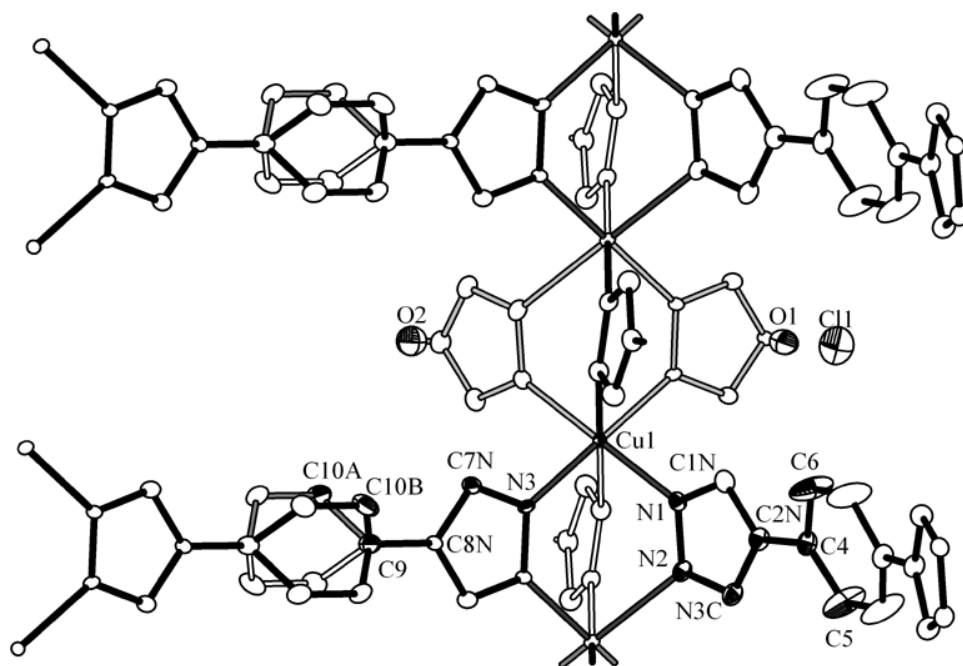

**Figure SI\_12.** Atom labelling scheme for structure  $\text{Cu}_2(\text{L2})_3\text{Cl}\cdot 12\text{H}_2\text{O}$  (**8**). The uncoordinated chloride anions and water molecules are disordered in the lattice; the phenylene fragments are disordered over two positions (partial contributions 0.6 and 0.4; 40% ellipsoids).
